# Supplementary material
Source: publisher site journal article supplement (https://www.dovepress.com/article/590989)

**Supplementary figures**

**Figure S1.** Bland-Altman plot comparing visual MTA and automated hippocampal volume

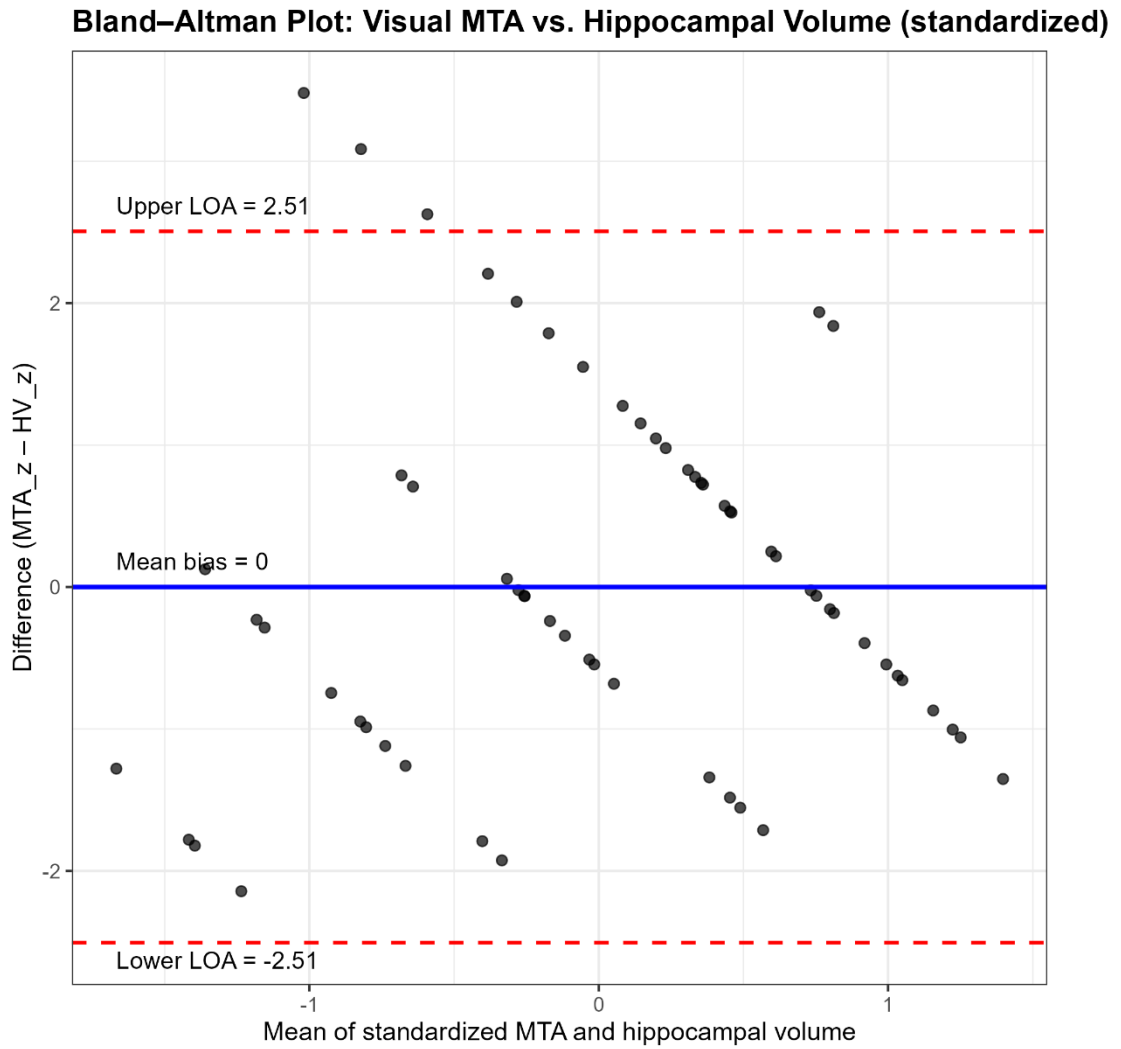

**Figure S2.** Scatterplot illustrating the association between visual MTA scores and hippocampal volume.

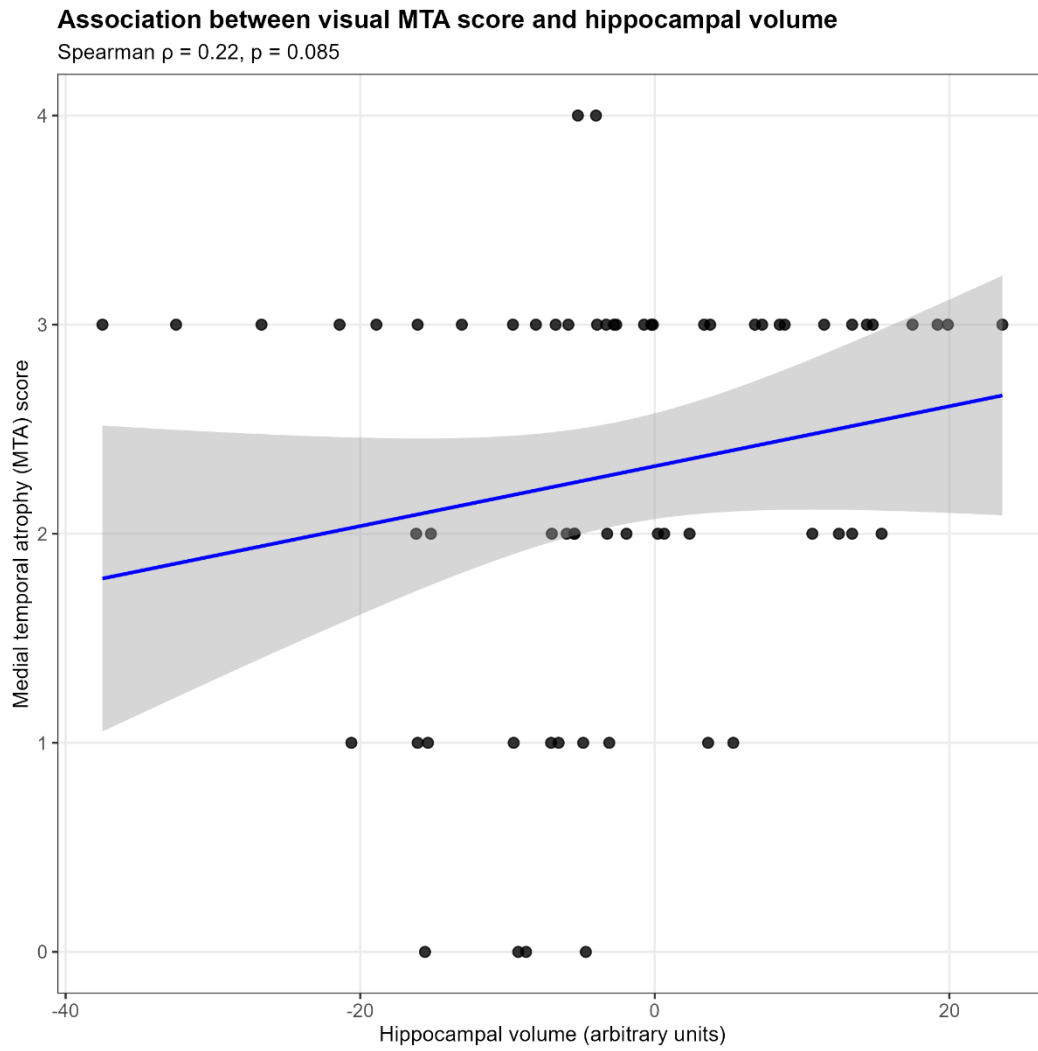

**Figure S3.** Forest plot of intraclass correlation coefficients (ICC) between visual MRI ratings and automated morphometry measures.

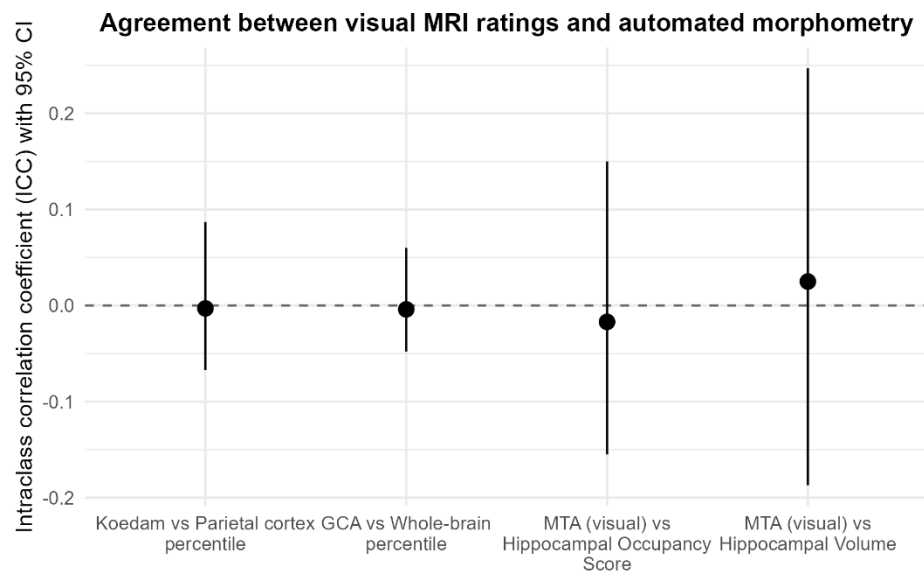

Supplement: Supplementary file 1 [file 590989%20Supplementary%20Material.pdf]
